# Supplementary material for: The presence of genes encoding enzymes that digest carbohydrates in coral genomes and analysis of their activities
Source: PeerJ journal article supplement (doi:10.7717/peerj.4087), 2017-11-28

1 2 3 4 5 6 7 8

GAPDH

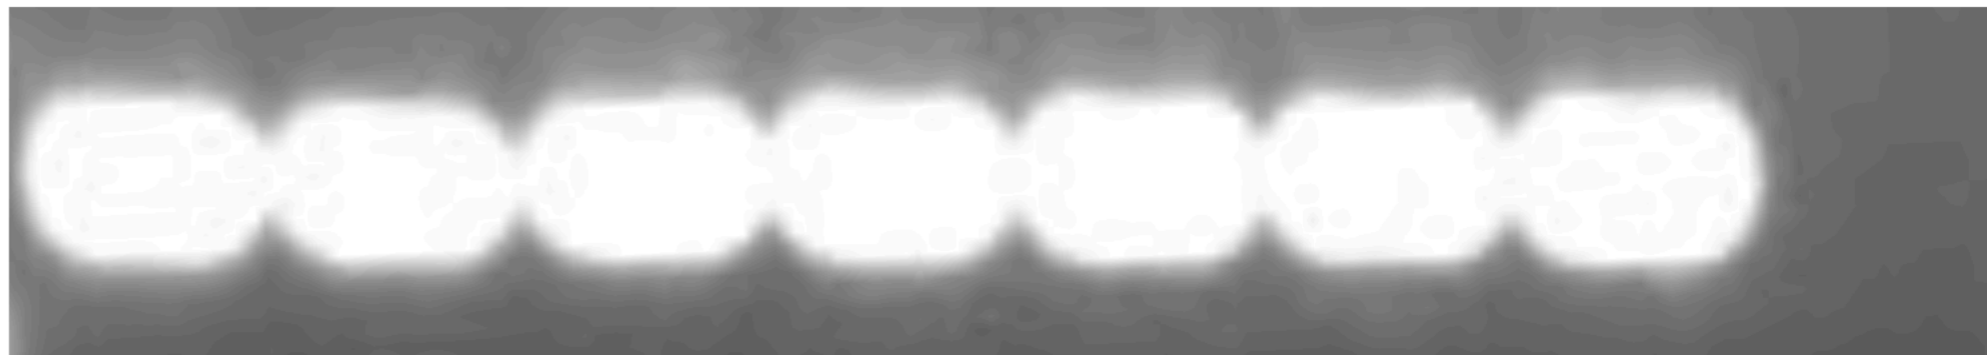

Cellulase-like-1

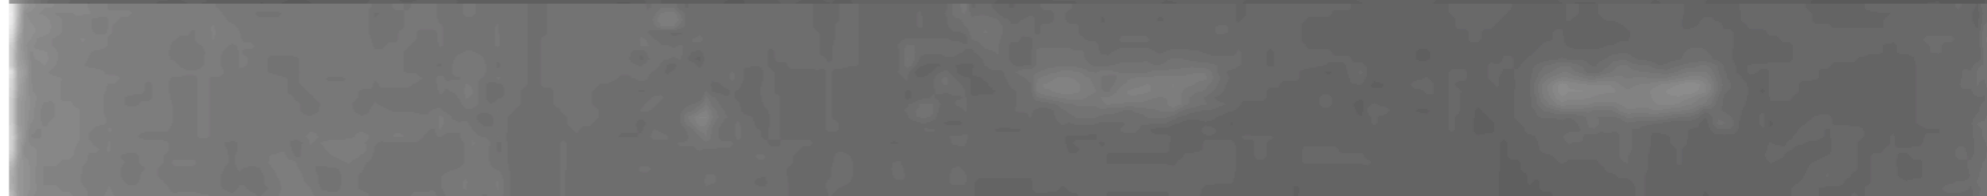

Chitinase-like-2

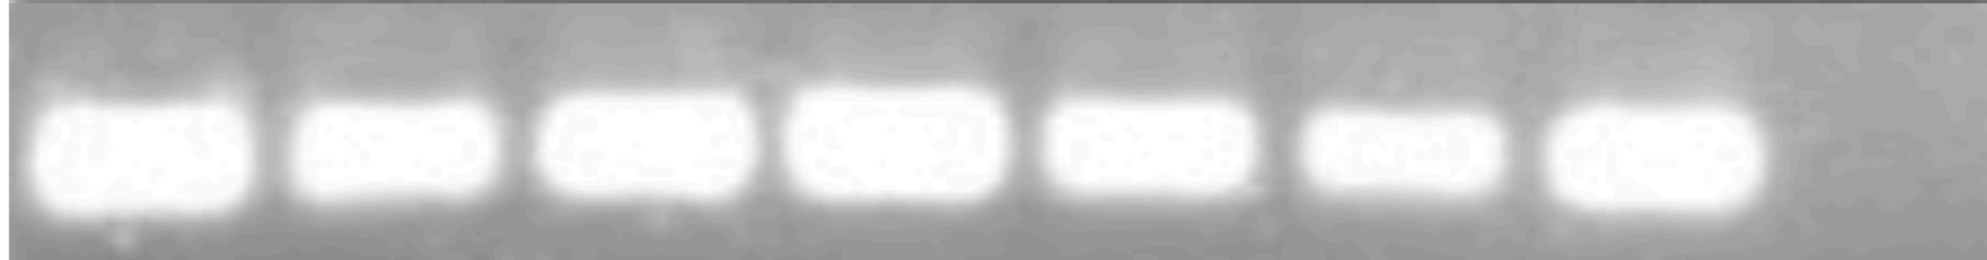

Supplement: FigureS1.pdf [file FigureS1.pdf]
